# Supplementary material for: Situated cognition: clinical reasoning and error are context dependent
Source: publisher site journal article supplement (doi:10.1515/dx-2020-0011), 2020-06-22
Supplement: Supplementary file 1 [file j_dx-2020-0011_suppl.docx]

**Supplementary material for**

https://doi.org/10.1515/dx-2019-0102

https://doi.org/10.1515/dx-2020-0004

https://doi.org/10.1515/dx-2020-0008

https://doi.org/10.1515/dx-2020-0011

https://doi.org/10.1515/dx-2020-0012

**Expanding Boundaries (dx-2019-0102):**

<https://www.vectorstock.com/royalty-free-vector/female-doctor-silhouettes-vector-12614356> (standard license purchased, female doctors)

<https://upload.wikimedia.org/wikipedia/commons/c/c8/Elderly_lady_seated.svg> (creative commons, with attribution)

<https://www.vectorstock.com/royalty-free-vector/hospital-building-medical-icon-vector-11647255> (standard license purchased, hospital)

<https://pixabay.com/vectors/ambulance-emergency-fire-truck-157036/> (free commercial reuse no attribution required, ambulance)

<https://www.vectorstock.com/royalty-free-vector/first-aid-help-after-crash-accident-silhouette-vector-26442939> (standard license purchased, paramedics)

<https://www.vectorstock.com/royalty-free-vector/high-detailed-modern-computer-vector-27719764> (standard license purchased, computer)

<https://www.vectorstock.com/royalty-free-vector/medical-record-hand-drawn-outline-doodle-icon-vector-21095088> (standard license purchased, chart)

<https://pixabay.com/vectors/mobile-phone-smart-ring-wireless-311167/> (free download, no attribution required)

<https://www.vectorstock.com/royalty-free-vector/heart-rate-monitor-icon-on-a-white-background-vector-23266987> (standard license purchase, heart monitor)

<https://www.vectorstock.com/royalty-free-vector/150-380x400-vector-5627713> (standard license purchase, operating theater)

**Embodied Cognition (dx-2020-0004):**

<https://en.wikipedia.org/wiki/File:McRoberts_maneuver.svg> (creative commons, public domain, McRobert’s maneuver)

<https://www.clipart.email/download/2260053.html> (public domain, with attribution, Male and female doctors)

**Ecological Psychology (dx-2020-0008):**

<https://www.istockphoto.com/vector/unconscious-vector-silhouette-gm165957516-20824716> (standard license purchased - nurse patient)

<https://www.vectorstock.com/royalty-free-vector/female-doctor-silhouettes-vector-12614356> (standard license purchased, female doctors)

<https://www.kissclipart.com/woman-on-computer-silhouette-clipart-computer-clip-9d7rqj/> (computer table, public domain)

<http://hqmeded-ecg.blogspot.com/2017/02/patient-with-severe-dka-look-at-ecg.html> (creative commons with attribution, ECG)

**Situated Cognition (dx-2020-0011):**

<https://www.vectorstock.com/royalty-free-vector/doctor-office-vector-21461699> (standard license purchased, doctor’s office)

<https://www.vectorstock.com/royalty-free-vector/female-doctor-set-vector-25925819> (standard license purchased, African American doctor)

<https://www.vectorstock.com/royalty-free-vector/stressed-woman-vector-27480842> (standard license purchased, woman with headache)

<https://www.vectorstock.com/royalty-free-vector/female-doctor-vector-25925815> (standard license purchased, student with phone)

<https://commons.wikimedia.org/wiki/File:Erythema_migrans_-_erythematous_rash_in_Lyme_disease_-_PHIL_9875.jpg> (lyme rash, CDC, public domain)

<https://www.vectorstock.com/royalty-free-vector/brown-tick-vector-9694993> (standard license purchased, tick)

<https://www.vectorstock.com/royalty-free-vector/tent-vector-2952942> (standard license purchased, tent)

**Distributed Cognition (dx-2020-0012):**

Palm tree: <https://www.needpix.com/photo/download/178110/palm-tree-silhouette-summer-heat-black-free-vector-graphics-free-pictures-free-photos-free-images> (public domain)

Car accident: <https://www.vectorstock.com/royalty-free-vector/automobile-damaged-by-collision-isolated-on-white-vector-21392219> (standard license purchased)

Paramedic transport <https://www.istockphoto.com/vector/paramedics-and-patient-vector-silhouette-gm165625623-9366646> (standard license purchased)

Community Hospital <https://www.vectorstock.com/royalty-free-vector/hospital-flat-building-icon-vector-14923026> (standard license purchased)

Ambulance: <https://www.vectorstock.com/royalty-free-vector/ambulance-vector-413884> (standard license purchased)

Patient with IV <https://www.istockphoto.com/vector/nursing-duties-gm478270493-27004670> (standard license purchased)

Nurse and computer with patient <https://www.istockphoto.com/vector/patient-data-search-gm674705662-123690273> (standard license purchased)

Radiologist CT: <https://www.123rf.com/photo_49850032_stock-vector-doctor-looking-at-results-of-patient-brain-scan-on-the-monitor-screens-in-front-of-mri-machine-with-.html> (standard license purchased)
